# Supplementary material for: A framework for experimental scenarios of global change in marine systems using coral reefs as a case study
Source: R Soc Open Sci. 2020 Jan 22;7(1):191118. doi: 10.1098/rsos.191118 (PMC7029932; doi:10.1098/rsos.191118)
Supplement: Coral reef regional temperature projections. [file rsos191118supp3.csv]

region	RCP2.6 (temp in degrees C)	RCP4.5 (temp in degrees C)	RCP6.0 (temp in degrees C)	RCP8.5 (temp in degrees C)
Caribbean Sea/ Gulf of Mexico	0.68	1.43	1.87	3.14
Arabian Gulf	1.3	2.39	2.96	4.26
Red Sea	0.88	1.65	2.39	3.45
Indian Ocean (east)	0.37	1.18	1.59	2.76
Indian Ocean (west)	0.43	1.18	1.71	2.97
Coral Triangle and Southeast Asia	0.58	1.35	1.75	2.95
Pacific Ocean (east)	0.63	1.44	1.99	3.23
Pacific Ocean (west)	0.3	1.02	1.39	2.66
